# Supplementary material for: Facile template-free synthesis of ultralayered mesoporous nickel cobaltite nanowires towards high-performance electrochemical capacitors
Source: Royal Society of Chemistry journal article supplement (doi:10.1039/c2jm32351f), 2012-01-01
Supplement: c2jm32351f.pdf [file c2jm32351f.pdf]

Supplementary materials for Journal of Materials Chemistry

This journal is © The Royal Society of Chemistry 2012

## Electronic Supplementary Information (ESI)

### **Facile template-free synthesis of ultralayered mesoporous nickel cobaltite nanowires towards high-performance electrochemical capacitors**

**Changzhou Yuan <sup>\*a</sup>, Jiaoyang Li <sup>a</sup>, Linrui Hou <sup>a</sup>, Long Yang <sup>a</sup>, Laifa Shen <sup>b</sup>, Xiaogang  
Zhang <sup>\*b</sup>**

<sup>a</sup> *Anhui Key Laboratory of Metals and processing, School of Materials Science and Engineering,*

*Anhui University of Technology, Ma`anshan, 243002, P.R. China.*

<sup>b</sup> *College of Material Science and Engineering, Nanjing University of Aeronautics and*

*Astronautics, Nanjing, 210016, P.R. China.*

*E-mail: ayuancz@163.com; azhangxg@163.com*

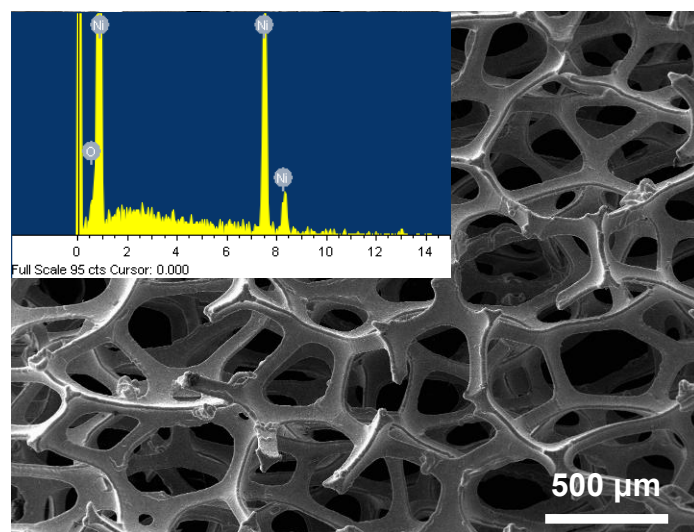

**Fig. S1** FESEM images and EDAX (the inset) of the pretreated nickel foam

As seen in the Fig. S1, a three dimensional (3 D) grid structure and hierarchical porosity can be seen for the Ni foam itself. Moreover, the high purity of the Ni foam can be seen from the EDAX data (the inset in Fig. S1).

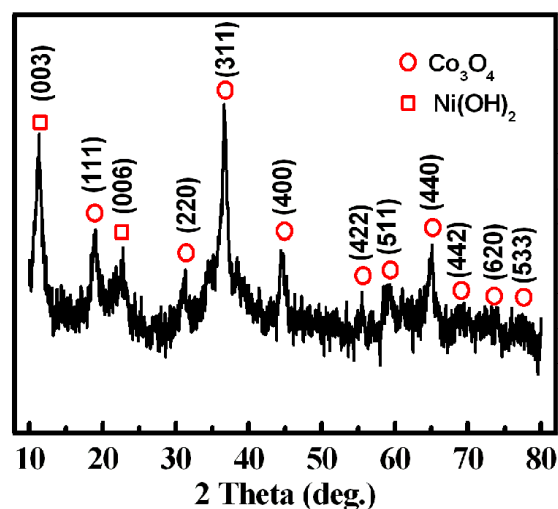

**Fig. S2** XRD pattern of the uncalcinated precursor of the  $\text{NiCo}_2\text{O}_4$  NWs

Of note,  $\text{Co}^{2+}$  and  $\text{Ni}^{2+}$  ions have similar coordination capability with other ions. Here, the added  $\text{NH}_4\text{NO}_3$  makes the bivalent  $\text{Co}^{2+}$  and  $\text{Ni}^{2+}$  ions fully coordinated with  $\text{NH}_4^+$  to form  $\text{M}(\text{NH}_3)_x^{2+}$  ions,<sup>[1]</sup> which will result in a relatively constant ratio of  $\text{Co}^{2+}$  to  $\text{Ni}^{2+}$  ions.<sup>[1-4]</sup> Additionally,  $\text{Co}^{2+}$  and  $\text{Ni}^{2+}$  ions have similar affinity towards  $\text{OH}^-$  ions according to their solubility constants.<sup>[1-4]</sup> The difference between  $\text{Ni}^{2+}$  and  $\text{Co}^{2+}$  ions may be reduced by forming complex with  $\text{NH}_4^+$ , which leads to a similar nucleation and grown rate of  $\text{Co}(\text{OH})_2$  and  $\text{Ni}(\text{OH})_2$ . Then during the following stirring and refluxing process, the  $\text{Co}_3\text{O}_4$  comes from the solid-state reaction between the formed  $\text{Co}(\text{OH})_2$  and the dissolved oxygen in the solution following the reactions as reported before<sup>[5, 6]</sup>:

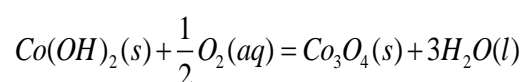

As seen from the Fig. S2, clearly, the uncalcinated precursor can be well indexed as a mixed phase including the  $\text{Ni}(\text{OH})_2$  (JCPDS card no. 38-0715) and cubic  $\text{Co}_3\text{O}_4$  (JCPDS card no. 43-1007).

- [1] L.Y. Yuan, X.H. Lu, X. Xiao, T. Zhai, J.J. Dai, F.C. Zhang, B. Hu, X. Wang, L. Gong, J. Chen, C.G. Hu, Y.X. Tong, J. Zhou, Z.L. Wang, *ACS Nano*, **2012**, 6, 656-661.
- [2] X.H. Lu, D.Z. Zheng, T. Zhai, Z.Q. Liu, Y.Y. Huang, S.L. Xie, Y.X. Tong, *Energy Environ. Sci.*, **2011**, 4, 2915-2912.
- [3] D. Yuan, T.X. Zhou, S.L. Zhou, S.S. Mo, N.N. Xia, *Electrochem. Commun.*, **2011**, 13, 242-246.
- [4] X.H. Lu, X. Huang, S.L. Xie, T. Zhai, C.S. Wang, P. Zhang, M.H. Yu, W. Li, C.L. Liang, Y.X. Tong, *J. Mater. Chem.*, **2012**, DOI:10.1039/C2JM30927K.
- [5] Y.G. Li, B. Tan, Y.Y. Wu, *Nano Lett.* 2008, 8, 265-270.
- [6] Y.G. Li, B. Tan, Y.Y. W, *J. Am. Chem. Soc.* 2006, 128, 14258-14259.

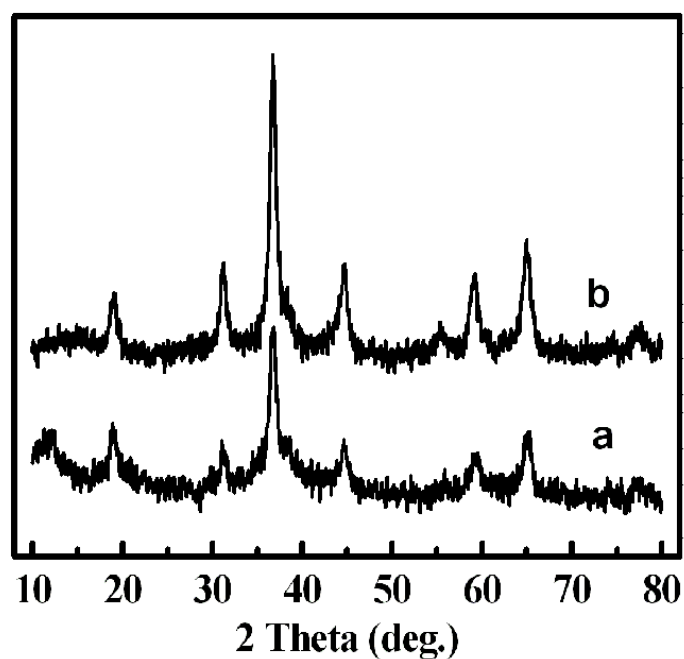

**Fig. S3** XRD patterns for the precursor of the  $\text{NiCo}_2\text{O}_4$  NWs calcinated at different temperatures. (a) 200 °C; (b) 400 °C.

As seen from the Fig. S3, after calcinated at 200 °C, the obtained sample still presents typical diffraction peaks of  $\text{Ni}(\text{OH})_2$ , with the comparison with the Fig. S2. And when the temperature increases up to 300 and 400 °C, the diffraction peak of  $\text{Ni}(\text{OH})_2$  wholly disappears and the pure phase of  $\text{NiCo}_2\text{O}_4$  can be found.

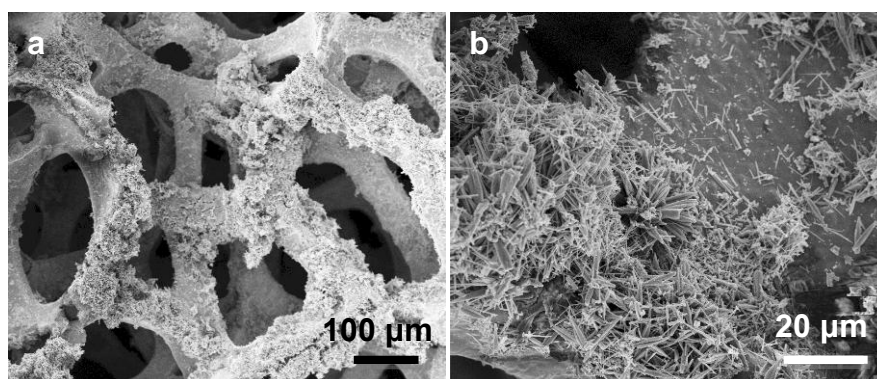

**Fig. S4** FESEM images of the  $\text{NiCo}_2\text{O}_4$  NWs/nickel foam after ultrasonication.

After ultrasonication for 1h in ethanol, the  $\text{NiCo}_2\text{O}_4$  NWs/nickel foam still demonstrates black color and the ethanol solution turns out to dark black. As seen from Fig. S4, some  $\text{NiCo}_2\text{O}_4$  NWs still can be found randomly dispersed on the surface of the Ni foam after ultrasonication, demonstrating a disordered NWs structure. Therefore, it is easy to conclude that the adherence of  $\text{NiCo}_2\text{O}_4$  NWs to the Ni foam is relatively strong.

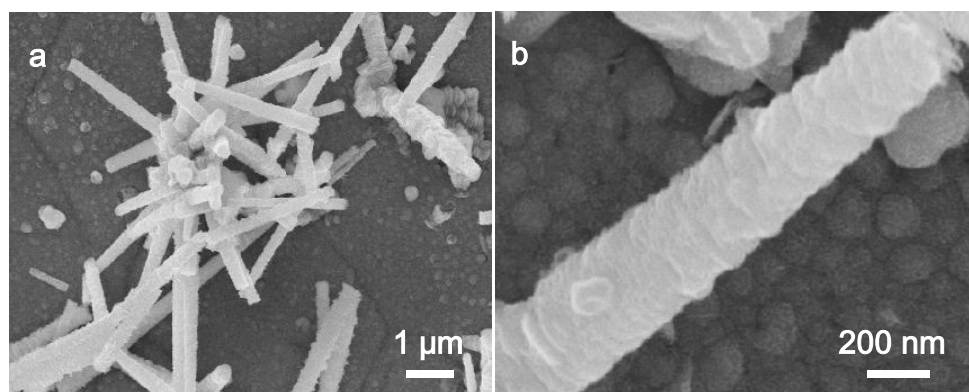

**Fig. S5** FESEM images of the precursor for the  $\text{NiCo}_2\text{O}_4$  NWs

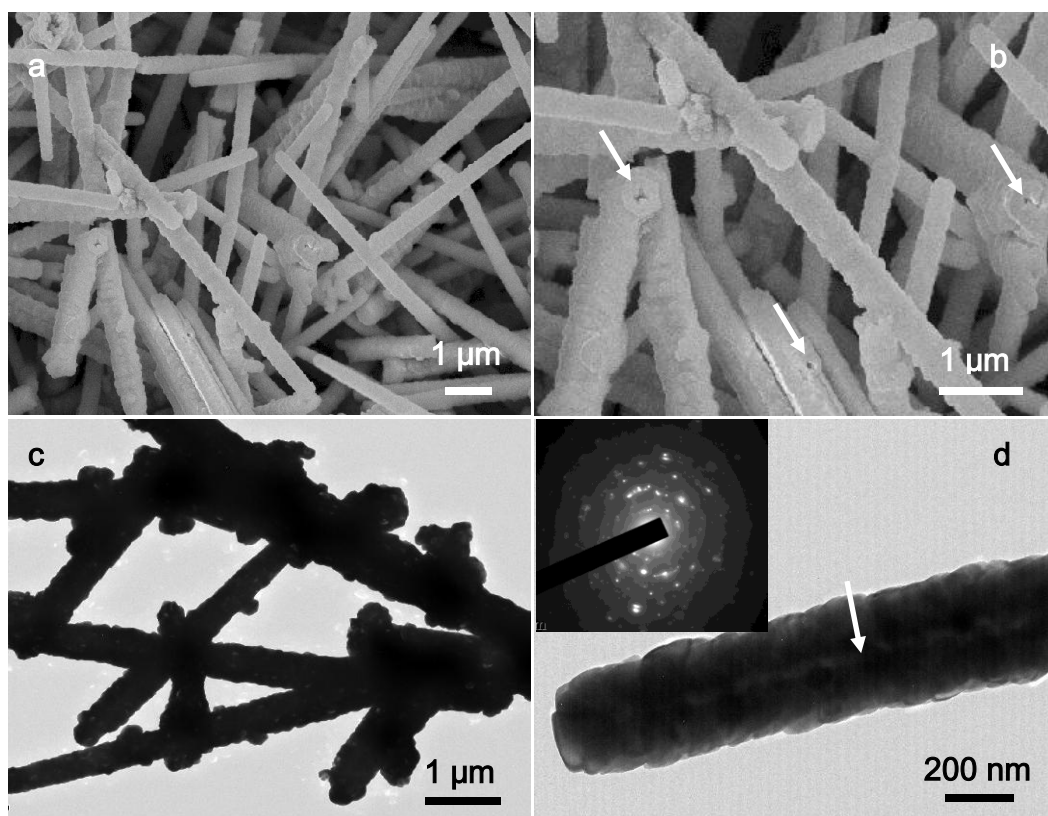

**Fig. S6** FESEM (a, b), TEM (c, d) images and SAED pattern (the inset in d) of the  $\text{Co}_3\text{O}_4$  NWs. The white arrays indicate their hollow nature



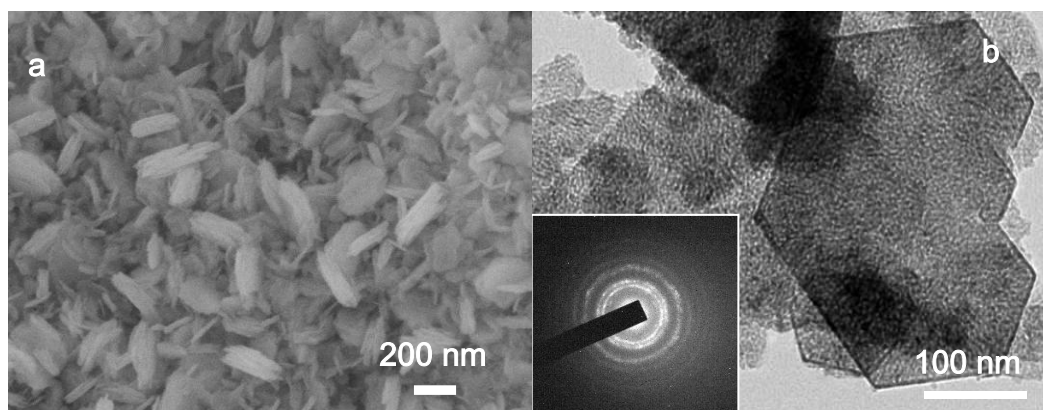

**Fig. S7** (a) SEM, (b) TEM images and SAED pattern (the inset in b) of the NiO nanosheets

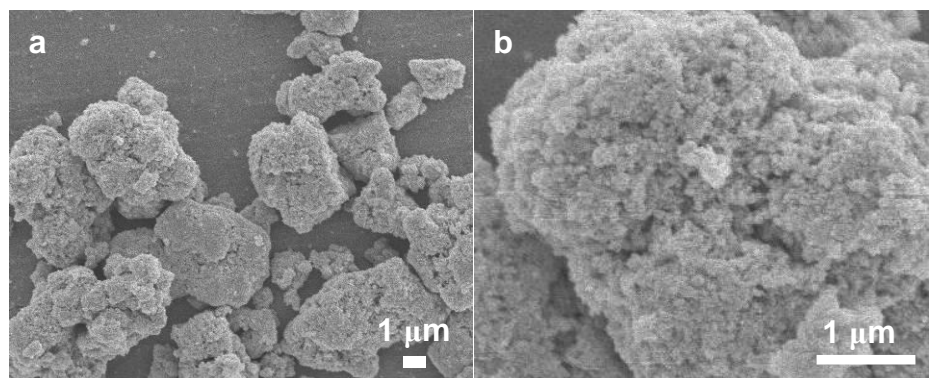

**Fig. S8** FESEM images of the  $\text{NiCo}_2\text{O}_4$  obtained from the bottom of the three-neck bottle

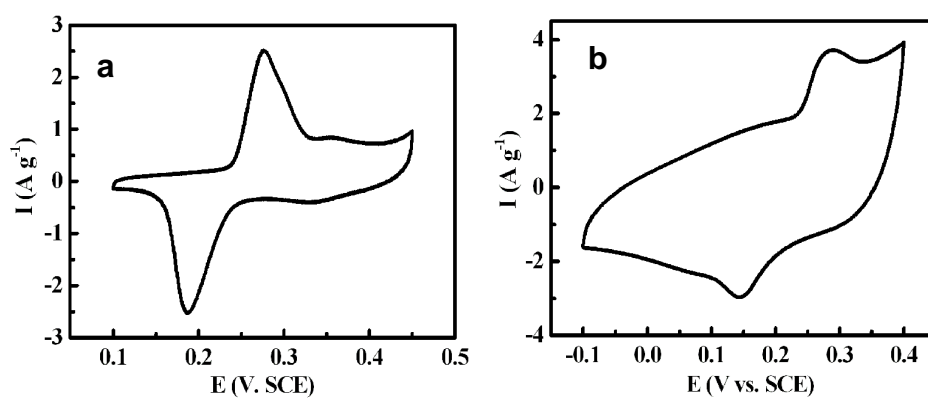

**Fig. S9** CV curves (10 mV s<sup>-1</sup>) of the Co<sub>3</sub>O<sub>4</sub> NWs (a) and NiO nanosheets (b), respectively.

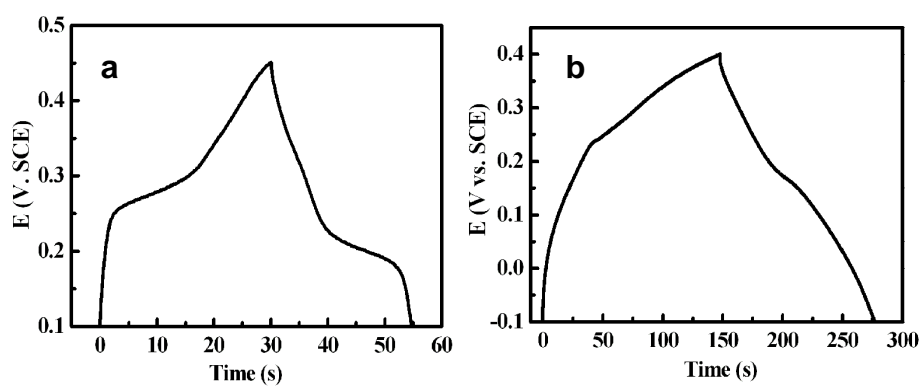

**Fig. S10** CP plots ( $1 \text{ A g}^{-1}$ ) of the  $\text{Co}_3\text{O}_4$  NWs (a) and NiO nanosheets (b), respectively.
